# Supplementary material for: The Medium Composition Impacts Staphylococcus aureus Biofilm Formation and Susceptibility to Antibiotics Applied in the Treatment of Bone Infections
Source: MDPI journal article supplement (doi:10.3390/ijms231911564), 2022-09-30
Supplement: s1 [file s1]

**Table S1.** Ability to form biofilm assessed by Crystal Violet (CV) and Richard's (RM) methods of methicillin-susceptible (MSSA) and methicillin-resistant (MRSA) *Staphylococcus aureus* strains cultivated in three media: tryptic soy broth TSB, tryptic soy broth with 1% glucose TSB+G and Dulbecco's Modified Eagle Medium DMEM expressed as an average values of absorbance measured at 550 nm (CV) and 490 nm (RM) wavelength and standard deviations in brackets.

| Method | Strain | Absorbance  |             |             |
|--------|--------|-------------|-------------|-------------|
|        |        | TSB         | TSB+G       | DMEM        |
| CV     | ALL    | 2,96 (0,58) | 3,73 (1,27) | 1,69 (0,20) |
|        | MSSA   | 3,33 (0,49) | 4,26 (1,03) | 1,64 (0,22) |
|        | MRSA   | 2,58 (0,37) | 3,20 (1,26) | 1,73 (0,18) |
| RM     | ALL    | 2,56 (0,56) | 1,80 (0,79) | 0,74 (0,30) |
|        | MSSA   | 2,92 (0,51) | 2,12 (0,53) | 0,84 (0,35) |
|        | MRSA   | 2,21 (0,33) | 1,49 (0,87) | 0,64 (0,19) |

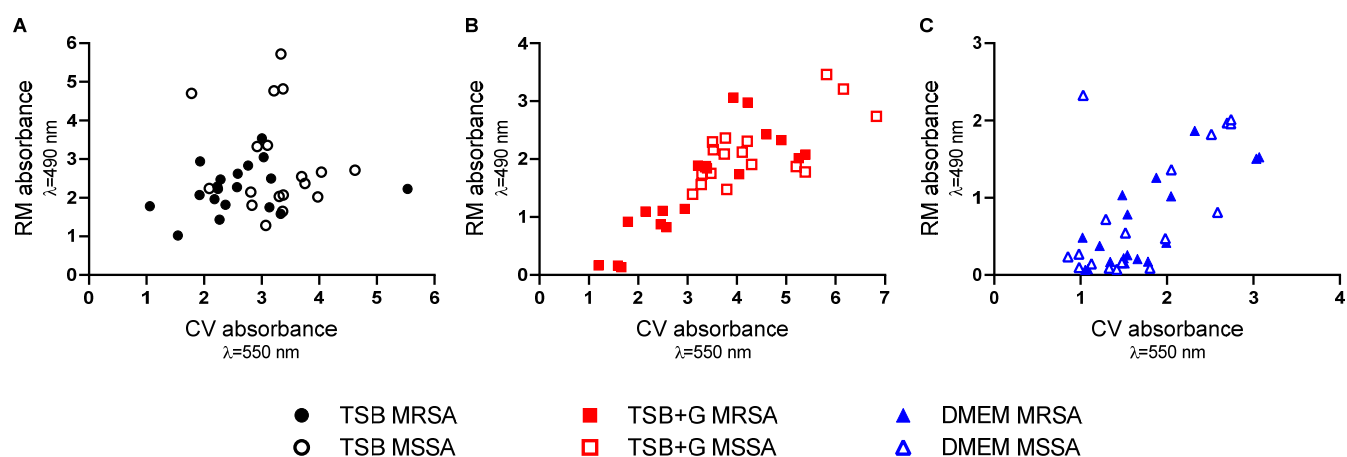

**Figure S1.** Scatter plots of correlations between the ability to form biofilm assessed with the Crystal Violet method (CV) and bacterial metabolic activity measured with the Richard's method (RM) for methicillin-susceptible *Staphylococcus aureus* MSSA and methicillin-resistant *Staphylococcus aureus* MRSA strains cultured in tryptic soy broth TSB (a), tryptic soy broth with 1% glucose TSB+G (b) and Dulbecco's Modified Eagle Medium DMEM (c).

**Table S2.** Zones of inhibitions of gentamycin GENTA, ciprofloxacin CIPRO, levofloxacin LEVO obtained by disk-diffusion method, and minimal inhibitory concentrations of vancomycin VANCO obtained by a strip diffusion method for methicillin-susceptible (S1-S5, ATCC 6538) and methicillin-resistant *Staphylococcus aureus* strains (R1-R5, ATCC 33591). Results were interpreted following European Committee on Antimicrobial Susceptibility Testing breaking points table. S – susceptible, I – susceptible, increased exposure, R – resistant; ATCC – American Type Culture Collection.

| Agar diffusion method | Zones of inhibition [mm] |       |       |      |       |  | MIC [mg/L] |  |
|-----------------------|--------------------------|-------|-------|------|-------|--|------------|--|
|                       | STRAIN                   | GENTA | CIPRO | LEVO | VANCO |  |            |  |
|                       | S1                       | 30 S  | 32 I  | 31 I | 0.5 S |  |            |  |
|                       | S2                       | 28 S  | 33 I  | 35 I | 0.5 S |  |            |  |
|                       | S3                       | 27 S  | 32 I  | 33 I | 1 S   |  |            |  |



[illegible]
